# Supplementary material
Source: MDPI journal article supplement (https://www.mdpi.com/2073-445X/12/2/440)
Supplement: s1 [file s1]

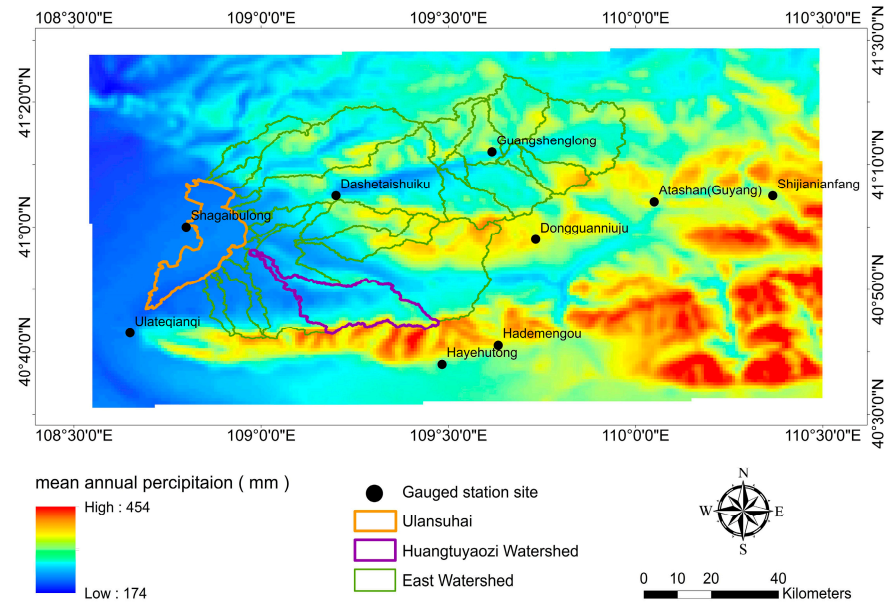

**Figure S1.** Mean annual precipitation from 1986 to 2015 calculated by CHELSA data, and the location of gauged station site surrounding the HTYZ area.

**Table S1.** Estimation of P factor in the HTYZ.

| Slope (%) | Contouring | Strip Cropping | Terracing |
|-----------|------------|----------------|-----------|
| 0.0-7.0   | 0.55       | 0.27           | 0.10      |
| 7.0-11.3  | 0.60       | 0.30           | 0.12      |
| 11.3-17.6 | 0.80       | 0.40           | 0.16      |
| 17.6-26.8 | 0.90       | 0.45           | 0.18      |
| > 26.8    | 1.00       | 0.50           | 0.20      |

**Table S2.** The K factor in HTYZ.

| Soil Code | K       | Area (km2) | Area (%) |
|-----------|---------|------------|----------|
| CMc       | 0.02282 | 82.7649    | 23.65%   |
| RGc       | 0.02208 | 19.8261    | 5.67%    |
| KSh       | 0.02041 | 117.5391   | 33.59%   |
| GLk       | 0.01997 | 8.3790     | 2.39%    |
| GRh       | 0.01902 | 4.3749     | 1.25%    |
| CHk       | 0.01695 | 33.7185    | 9.63%    |
| ARc       | 0.01572 | 0.0387     | 0.01%    |
| ARh       | 0.01570 | 2.1015     | 0.60%    |
| ARb       | 0.01564 | 81.2196    | 23.21%   |

**Table S3.** The LS factor of HTYZ.

| LS factor | Area (km2) | Area (%) |
|-----------|------------|----------|
| <1        | 115.8786   | 33.12    |
| 1-15      | 197.4501   | 56.44    |
| 15-30     | 33.7059    | 9.63     |
| >30       | 2.9097     | 0.83     |

**Table S4.** The C factor of HTYZ.

| <b>C factor</b> | <b>Area (km2)</b> | <b>Area (%)</b> |
|-----------------|-------------------|-----------------|
| <0.5            | 74.9520           | 21.42           |
| 0.5–0.8         | 194.3235          | 55.53           |
| 0.8–1           | 80.0235           | 22.87           |
| >1              | 0.6444            | 0.18            |

**Table S5.** The P factor of HTYZ.

| <b>P factor</b> | <b>Area (km2)</b> | <b>Area (%)</b> |
|-----------------|-------------------|-----------------|
| 0.55            | 34.6455           | 9.90            |
| 0.6             | 56.7009           | 16.21           |
| 0.8             | 156.3858          | 44.70           |
| 0.9             | 49.9554           | 14.28           |
| 1               | 52.1721           | 14.91           |

**Table S6.** The severity levels of soil loss in the HTYZ.

| <b>Soil erosion (t ha<sup>-1</sup> yr<sup>-1</sup>)</b> | <b>Severity classes</b> | <b>Area (km<sup>2</sup>)</b> | <b>Area (%)</b> |
|---------------------------------------------------------|-------------------------|------------------------------|-----------------|
| 0–10                                                    | very slight             | 279.629                      | 80.06           |
| 10–25                                                   | slight                  | 46.022                       | 13.18           |
| 25–50                                                   | moderate                | 20.198                       | 5.78            |
| 50–80                                                   | severe                  | 3.226                        | 0.92            |
| 80–150                                                  | extreme severe          | 0.194                        | 0.06            |
